# Supplementary material
Source: PubMed Central journal article supplement (PMC3274776)
Supplement: NIHMS330277-supplement-2.pdf [file NIHMS330277-supplement-2.pdf]

**Taylor et al. Frequent alterations and epigenetic silencing in differentiation pathway genes in structurally rearranged liposarcomas**  
**List of supplementary tables**

**Table S1:** Clinical characteristics of sequenced patient tumors.

**Table S2:** Somatic rearrangements in liposarcoma genomes

**Table S3:** Expressed gene fusions.

**Table S4:** Somatic mutations in liposarcoma

**Table S5:** Allele-specific expression in liposarcoma transcriptomes.

**Table S6:** Adenosine-to-inosine RNA editing events.

**Table S7:** Primers used for mutation and methylation validation.

**Table S1:** Clinical characteristics of sequenced patient tumors.

| <b>Case</b>                                             | <b>DLPS1</b>          | <b>DLPS2</b>           |
|---------------------------------------------------------|-----------------------|------------------------|
| <b>Data related to patient's primary tumor</b>          |                       |                        |
| Age at presentation                                     | 60                    | 74                     |
| Gender                                                  | Male                  | Female                 |
| Primary grade                                           | High                  | Low                    |
| Primary depth                                           | Deep depth            | Deep depth             |
| Size (largest dimension--primary tumor)                 | 25                    | 9                      |
| Histology for primary tumor                             | Liposarcoma           | Liposarcoma            |
| Variant for primary tumor                               | Dedifferentiated      | Well-differentiated    |
| Primary site                                            | Retro-intrabdominal   | Retro-intrabdominal    |
| Primary subsite                                         | Retroperitoneum       | Retroperitoneum        |
| Diagnosis date                                          | 22-Dec-04             | 19-Jan-07              |
| <b>Data related to patient's first surgery at MSKCC</b> |                       |                        |
| Presentation date                                       | 21-Jan-05             | 10-May-07              |
| Presentation status                                     | Primary-only (biopsy) | Local recurrence       |
| First MSK surgery date                                  | 27-Jan-05             | 23-Oct-07              |
| First MSK surgery status                                | Primary-only          | First local recurrence |
| First surgery at MSK status--MICRO margins              | Positive              | Positive               |
| First surgery at MSK status--GROSS margins              | Negative              | Negative               |
| First surgery at MSK status--R0,R1,R2                   | R1                    | R1                     |
| Local recurrence since presentation                     | 11-Jul-05             | 4-Dec-08               |
| Time to local recurrence after presentation             | 6.60                  | 22.51                  |
| Metastasis since presentation                           | -                     | -                      |
| Time to distant recurrence after presentation           | -                     | -                      |
| <b>Data related to patient's sample</b>                 |                       |                        |
| Stage of sample                                         | Primary               | First local recurrence |
| Surgery date of sample                                  | 27-Jan-05             | 23-Oct-07              |
| Sample status-- R0,R1,R2                                | R1                    | R1                     |
| Histology of the sample                                 | Liposarcoma           | Liposarcoma            |
| Variant of the sample                                   | Dedifferentiated      | Dedifferentiated       |
| Grade of the sample                                     | High                  | High                   |
| Largest dimension size of the sample                    | 25                    | 9                      |
| First LR post-sample                                    | 11-Jul-05             | 4-Dec-08               |
| Time to LR from sample date                             | 5.42                  | 13.40                  |
| First DR post-sample                                    | None                  | None                   |
| Time to DR from sample date                             | -                     | -                      |
| <b>General follow-up</b>                                |                       |                        |
| Comorbidities                                           | None reported         | None reported          |
| Survival date (FUP)                                     | 17-Feb-11             | 12-Apr-11              |
| Status                                                  | AWD                   | AWD                    |
| Overall survival (months from diagnosis)                | 73.86                 | 50.73                  |
| Overall survival (months from presentation)             | 72.87                 | 47.08                  |
| Overall survival (months from sample)                   | 72.67                 | 41.63                  |

\* AWD; alive with disease





|       |                                                                                           |         |    |                   |    |                    |     |         |                |   |        |           |   |
|-------|-------------------------------------------------------------------------------------------|---------|----|-------------------|----|--------------------|-----|---------|----------------|---|--------|-----------|---|
| DLPS1 | Intrachromosomal inverted orientation, mixed-type complex - non-amplified DNA             | Somatic | 19 | 13268365-13287080 | 19 | 17386375-17386410  | 36  | CACNA1A | NM_00127221    | - | CDS    | Intron 11 | 1 |
| DLPS1 | Intrachromosomal inverted orientation, mixed-type complex - amplicon-to-amplicon          | Somatic | 19 | 13425396-13462482 | 19 | 22509503-22510471  | 52  | CACNA1A | NM_00127221    | - | CDS    | Intron 2  | 0 |
| DLPS1 | Intrachromosomal inverted orientation, mixed-type complex - amplicon-to-amplicon          | Somatic | 19 | 13739913-13739575 | 19 | 33704373-33705036  | 5   | MIR1    | miR-102        | + | 5' UTR |           |   |
| DLPS1 | Intrachromosomal non-inverted orientation - amplicon-to-amplicon                          | Somatic | 19 | 13865585-13868643 | 19 | 21270703-21272789  | 10  | C1orf87 | NM_003423      | - | CDS    | Intron 3  | 2 |
| DLPS1 | Intrachromosomal inverted orientation, mixed-type complex                                 | Somatic | 19 | 14022261-14022618 | 19 | 16241595-16241618  | 6   |         |                | - |        |           |   |
| DLPS1 | Intrachromosomal inverted orientation, mixed-type complex                                 | Somatic | 19 | 16027296-16028875 | 19 | 16027811-16029392  | 6   |         |                | - |        |           |   |
| DLPS1 | Intrachromosomal inverted orientation, non-amplified DNA-to-amplicon                      | Somatic | 19 | 17296001-17287885 | 19 | 21528841-21529633  | 6   | DDA1    | NM_004050      | + | CDS    | Intron 3  | 0 |
| DLPS1 | Intrachromosomal inverted orientation, mixed-type complex - non-amplified DNA-to-amplicon | Somatic | 19 | 18573859-18574482 | 19 | 18573859-18574482  | 6   | CRF1    | NM_004573      | - | CDS    | Intron 2  | 0 |
| DLPS1 | Intrachromosomal inverted orientation, mixed-type complex - non-amplified DNA-to-amplicon | Somatic | 19 | 19060012-1906287  | 19 | 19746813-19747088  | 38  | GNIP    | NM_005650      | - | CDS    | Intron 18 | 2 |
| DLPS1 | Intrachromosomal inverted orientation, mixed-type complex - amplicon-to-amplicon          | Somatic | 19 | 19635630-19636606 | 19 | 21678352-21692311  | 39  |         |                | - |        |           |   |
| DLPS1 | Intrachromosomal inverted orientation, mixed-type complex - amplicon-to-amplicon          | Somatic | 19 | 20012266-20013503 | 19 | 20055445-20057028  | 6   |         |                | - |        |           |   |
| DLPS1 | Intrachromosomal inverted orientation, mixed-type complex - amplicon-to-amplicon          | Somatic | 19 | 20824092-20824456 | 19 | 21768069-21768433  | 40  |         |                | - |        |           |   |
| DLPS1 | Intrachromosomal inverted orientation, mixed-type complex - amplicon-to-amplicon          | Somatic | 19 | 21203222-21204065 | 19 | 2128511-21227347   | 30  |         |                | - |        |           |   |
| DLPS1 | Intrachromosomal non-reciprocal orientation - amplicon-to-amplicon                        | Somatic | 19 | 21289302-21291137 | 19 | 21837445-21837376  | 12  |         |                | - |        |           |   |
| DLPS1 | Intrachromosomal inverted orientation, mixed-type complex - amplicon-to-non-amplified DNA | Somatic | 19 | 21378161-21379099 | 19 | 22710425-22710719  | 21  | ZNF738  | Non-coding RNA |   |        |           |   |
| DLPS1 | Intrachromosomal inverted orientation, mixed-type complex - amplicon-to-amplicon          | Somatic | 19 | 21384444-21385174 | 19 | 22551384-22554360  | 16  | ZNF738  | Non-coding RNA |   |        |           |   |
| DLPS1 | Intrachromosomal inverted orientation, mixed-type complex - amplicon-to-amplicon          | Somatic | 19 | 21910981-21911519 | 19 | 22434453-22435063  | 6   |         |                | - |        |           |   |
| DLPS1 | Intrachromosomal inverted orientation, mixed-type complex - amplicon-to-amplicon          | Somatic | 19 | 22278870-22277875 | 19 | 22744729-22744883  | 6   |         |                | - |        |           |   |
| DLPS1 | Intrachromosomal inverted orientation, mixed-type complex - amplicon-to-amplicon          | Somatic | 19 | 22442624-22433362 | 19 | 15442091-15446381  | 40  |         |                | - |        |           |   |
| DLPS1 | Intrachromosomal inverted orientation, mixed-type complex - amplicon-to-amplicon          | Somatic | 19 | 23438034-23439164 | 19 | 34041942-34043072  | 6   |         |                | - |        |           |   |
| DLPS1 | Intrachromosomal inverted orientation, mixed-type complex - amplicon-to-amplicon          | Somatic | 19 | 33473111-33474505 | 19 | 34268483-34269625  | 6   |         |                | - |        |           |   |
| DLPS1 | Intrachromosomal inverted orientation, mixed-type complex - amplicon-to-amplicon          | Somatic | 19 | 37661783-37662788 | 19 | 38547195-38547195  | 1   | DPY19L3 | NM_207325      | + | CDS    | Intron 12 | 1 |
| DLPS1 | Intrachromosomal non-inverted orientation                                                 | Somatic | 19 | 6102381-61023235  | 19 | 61043973-61045417  | 6   | NLRP11  | NM_145007      | + | CDS    | Intron 9  | 1 |
| DLPS2 | Intrachromosomal non-reciprocal orientation - amplicon-to-amplicon                        | Somatic | 19 | 3251283-32517040  | 19 | 11551520-11552083  | 5   | LCK     | NM_003566      | + | CDS    | Intron 3  | 0 |
| DLPS2 | Intrachromosomal non-reciprocal orientation - amplicon-to-amplicon                        | Somatic | 19 | 40071294-40072655 | 19 | 40464073-40464464  | 27  |         |                | - |        |           |   |
| DLPS2 | Intrachromosomal non-reciprocal orientation - amplicon-to-amplicon                        | Somatic | 19 | 4100896-41001967  | 19 | 28891961-28892022  | 8   | NFYC    | NM_014223      | + | CDS    | Intron 6  | 0 |
| DLPS2 | Intrachromosomal non-reciprocal orientation - amplicon-to-amplicon                        | Somatic | 19 | 4100248-41002862  | 19 | 78616210-78616212  | 28  | NFYC    | NM_014223      | + | CDS    | Intron 7  | 0 |
| DLPS2 | Intrachromosomal non-reciprocal orientation - amplicon-to-amplicon                        | Somatic | 19 | 4100773-41009026  | 19 | 26892629-2689382   | 7   | NFYC    | NM_014223      | + | CDS    | Intron 8  | 0 |
| DLPS2 | Intrachromosomal inverted orientation, mixed-type complex - amplicon-to-amplicon          | Somatic | 19 | 4108334-41083516  | 19 | 61782463-61787658  | 128 |         |                | - |        |           |   |
| DLPS2 | Intrachromosomal non-reciprocal orientation - amplicon-to-amplicon                        | Somatic | 19 | 4182298-41825862  | 19 | 2114073-2116338    | 7   |         |                | - |        |           |   |
| DLPS2 | Intrachromosomal non-reciprocal orientation - amplicon-to-amplicon                        | Somatic | 19 | 4182244-41824772  | 19 | 11577245-11577458  | 6   |         |                | - |        |           |   |
| DLPS2 | Intrachromosomal non-reciprocal orientation - amplicon-to-amplicon                        | Somatic | 19 | 4182521-41825470  | 19 | 11564811-11565204  | 86  |         |                | - |        |           |   |
| DLPS2 | Intrachromosomal non-reciprocal orientation - amplicon-to-amplicon                        | Somatic | 19 | 4182533-41825688  | 19 | 11565203-11565236  | 6   |         |                | - |        |           |   |
| DLPS2 | Intrachromosomal non-reciprocal orientation - amplicon-to-amplicon                        | Somatic | 19 | 4182599-41825767  | 19 | 35152948-35155166  | 7   |         |                | - |        |           |   |
| DLPS2 | Intrachromosomal non-reciprocal orientation - amplicon-to-amplicon                        | Somatic | 19 | 4182771-41824752  | 19 | 27112040-27114021  | 7   |         |                | - |        |           |   |
| DLPS2 | Intrachromosomal non-reciprocal orientation - amplicon-to-amplicon                        | Somatic | 19 | 4182883-41828217  | 19 | 4574384-45745265   | 6   |         |                | - |        |           |   |
| DLPS2 | Intrachromosomal non-reciprocal orientation - amplicon-to-amplicon                        | Somatic | 19 | 4182734-41826282  | 19 | 4017786-42019314   | 5   |         |                | - |        |           |   |
| DLPS2 | Intrachromosomal non-reciprocal orientation - amplicon-to-amplicon                        | Somatic | 19 | 4182673-41826643  | 19 | 2711815-27114023   | 9   |         |                | - |        |           |   |
| DLPS2 | Intrachromosomal non-reciprocal orientation - amplicon-to-amplicon                        | Somatic | 19 | 418274-41827008   | 19 | 35138-35184477     | 6   | TESK2   | NM_007170      | - | CDS    | Intron 1  | 1 |
| DLPS2 | Intrachromosomal non-reciprocal orientation - amplicon-to-amplicon                        | Somatic | 19 | 4182478-41826775  | 19 | 11391186-113914013 | 6   | SUSD1   | NM_002486      | - | CDS    | Intron 8  | 1 |
| DLPS2 | Intrachromosomal non-reciprocal orientation - amplicon-to-amplicon                        | Somatic | 19 | 4182478-41826775  | 19 | 4574384-4574384    | 6   |         |                | - |        |           |   |
| DLPS2 | Intrachromosomal non-reciprocal orientation - amplicon-to-amplicon                        | Somatic | 19 | 4182478-41826775  | 19 | 11577222-115774488 | 18  |         |                | - |        |           |   |
| DLPS2 | Intrachromosomal non-reciprocal orientation - amplicon-to-amplicon                        | Somatic | 19 | 4182478-41826775  | 19 | 27114103-27116382  | 10  |         |                | - |        |           |   |
| DLPS2 | Intrachromosomal non-reciprocal orientation - amplicon-to-amplicon                        | Somatic | 19 | 4182478-41826775  | 19 | 11564808-11565236  | 81  |         |                | - |        |           |   |
| DLPS2 | Intrachromosomal non-reciprocal orientation - amplicon-to-amplicon                        | Somatic | 19 | 4182478-41826775  | 19 | 115650431-11565235 | 60  |         |                | - |        |           |   |
| DLPS2 | Intrachromosomal non-reciprocal orientation - amplicon-to-amplicon                        | Somatic | 19 | 4182478-41826775  | 19 | 11579974-115772207 | 8   |         |                | - |        |           |   |
| DLPS2 | Intrachromosomal non-reciprocal orientation - amplicon-to-amplicon                        | Somatic | 19 | 4182478-41826775  | 19 | 11564808-11565236  | 15  |         |                | - |        |           |   |
| DLPS2 | Intrachromosomal non-reciprocal orientation - amplicon-to-amplicon                        | Somatic | 19 | 4181583-41828281  | 19 | 11391009-113911307 | 22  | HVEP3   | NM_004503      | - | CDS    | Intron 3  | 0 |
| DLPS2 | Intrachromosomal non-reciprocal orientation - amplicon-to-amplicon                        | Somatic | 19 | 4181583-41828281  | 19 | 3515279-35153223   | 10  | HVEP3   | NM_004503      | - | CDS    | Intron 3  | 0 |
| DLPS2 | Intrachromosomal non-reciprocal orientation - amplicon-to-amplicon                        | Somatic | 19 | 4181583-41828281  | 19 | 4203172-42032951   | 35  | HVEP3   | NM_004503      | - | CDS    | Intron 3  | 0 |
| DLPS2 | Intrachromosomal non-reciprocal orientation - amplicon-to-amplicon                        | Somatic | 19 | 4181583-41828281  | 19 | 11565282-11565282  | 5   | HVEP3   | NM_004503      | - | CDS    | Intron 3  | 0 |
| DLPS2 | Intrachromosomal non-reciprocal orientation - amplicon-to-amplicon                        | Somatic | 19 | 4204698-42048820  | 19 | 4803294-48034881   | 647 | HVEP3   | NM_004503      | - | CDS    | Intron 1  | 1 |
| DLPS2 | Intrachromosomal non-reciprocal orientation - amplicon-to-amplicon                        | Somatic | 19 | 4205961-42059745  | 19 | 4205961-42059745   | 7   | HVEP3   | NM_004503      | - | CDS    | Intron 1  | 1 |
| DLPS2 | Intrachromosomal non-reciprocal orientation - amplicon-to-amplicon                        | Somatic | 19 | 4206373-42067387  | 19 | 11563720-115638231 | 19  | HVEP3   | NM_004503      | - | CDS    | Intron 1  | 1 |
| DLPS2 | Intrachromosomal non-reciprocal orientation - amplicon-to-amplicon                        | Somatic | 19 | 4206411-42070367  | 19 | 11563811-11563817  | 7   | HVEP3   | NM_004503      | - | CDS    | Intron 1  | 1 |
| DLPS2 | Intrachromosomal non-reciprocal orientation - amplicon-to-amplicon                        | Somatic | 19 | 4206428-42069549  | 19 | 42021520-42023643  | 10  | HVEP3   | NM_004503      | - | CDS    | Intron 1  | 1 |
| DLPS2 | Intrachromosomal non-reciprocal orientation - amplicon-to-amplicon                        | Somatic | 19 | 4206440-42068153  | 19 | 35104448-35142132  | 17  | HVEP3   | NM_004503      | - | CDS    | Intron 1  | 1 |
| DLPS2 | Intrachromosomal non-reciprocal orientation - amplicon-to-amplicon                        | Somatic | 19 | 4206568-42068581  | 19 | 27112095-27114082  | 6   | HVEP3   | NM_004503      | - | CDS    | Intron 1  | 1 |
| DLPS2 | Intrachromosomal non-reciprocal orientation - amplicon-to-amplicon                        | Somatic | 19 | 4207085-42069848  | 19 | 4574424-45745687   | 5   | HVEP3   | NM_004503      | - | CDS    | Intron 1  | 1 |
| DLPS2 | Intrachromosomal non-reciprocal orientation - amplicon-to-amplicon                        | Somatic | 19 | 4206873-4210078   | 19 | 11564810-115652297 | 17  | HVEP3   | NM_004503      | - | CDS    | Intron 1  | 1 |
| DLPS2 | Intrachromosomal non-reciprocal orientation - amplicon-to-amplicon                        | Somatic | 19 | 4206873-4210078   | 19 | 11565043-115652349 | 17  | HVEP3   | NM_004503      | - | CDS    | Intron 1  | 1 |
| DLPS2 | Intrachromosomal non-reciprocal orientation - amplicon-to-amplicon                        | Somatic | 19 | 4206873-4210078   | 19 | 11565235-11565238  | 171 | HVEP3   | NM_004503      | - | CDS    | Intron 1  | 1 |
| DLPS2 | Intrachromosomal non-reciprocal orientation - amplicon-to-amplicon                        | Somatic | 19 | 4206873-4210078   | 19 | 11565239-11565239  | 10  | HVEP3   | NM_004503      | - | CDS    | Intron 1  | 1 |
| DLPS2 | Intrachromosomal non-reciprocal orientation - amplicon-to-amplicon                        | Somatic | 19 | 4206873-4210078   | 19 | 11565240-11565261  | 8   | HVEP3   | NM_004503      | - | CDS    | Intron 1  | 1 |
| DLPS2 | Intrachromosomal inverted orientation, mixed-type complex - amplicon-to-amplicon          | Somatic | 19 | 4298488-42982676  | 19 | 14299260-14299978  | 12  | LEPRE1  | NM_022356      | - | CDS    | Intron 5  | 0 |
| DLPS2 | Intrachromosomal non-reciprocal orientation - non-amplified DNA-to-amplicon               | Somatic | 19 | 4301033-43019569  | 19 | 11564903-11564903  | 5   |         |                | - |        |           |   |
| DLPS2 | Intrachromosomal non-reciprocal orientation - non-amplified DNA-to-amplicon               | Somatic | 19 | 4302217-43033960  | 19 | 4574384-45745474   | 6   | CCDC23  | NM_199442      | - | CDS    | Intron 2  | 0 |
| DLPS2 | Intrachromosomal non-reciprocal orientation - non-amplified DNA-to-amplicon               | Somatic | 19 | 4305392-43096156  | 19 | 11564808-11565288  | 6   | CCDC23  | NM_199442      | - | CDS    | Intron 2  | 0 |
| DLPS2 | Intrachromosomal non-reciprocal orientation - non-amplified DNA-to-amplicon               | Somatic | 19 | 4548493-45491665  | 19 | 11564808-11565288  | 6   | CCDC23  | NM_199442      | - | CDS    | Intron 2  | 0 |
| DLPS2 | Intrachromosomal non-reciprocal orientation - amplicon-to-amplicon                        | Somatic | 19 | 4548411-45491665  | 19 | 6780807-67811092   | 10  | TESK2   | NM_007170      | - | CDS    | Intron 3  | 2 |
| DLPS2 | Intrachromosomal non-reciprocal orientation - amplicon-to-amplicon                        | Somatic | 19 | 4548444-45491665  | 19 | 35162203-35164441  | 10  | TESK2   | NM_007170      | - | CDS    | Intron 3  | 2 |
| DLPS2 | Intrachromosomal non-reciprocal orientation - amplicon-to-amplicon                        | Somatic | 19 | 4548465-45491665  | 19 | 11577003-115771298 | 29  | TESK2   | NM_007170      | - | CDS    | Intron 3  | 2 |
| DLPS2 | Intrachromosomal non-reciprocal orientation - amplicon-to-amplicon                        | Somatic | 19 | 4548491-45491665  | 19 | 42021496-42023644  | 17  | TESK2   | NM_007170      | - | CDS    | Intron 3  | 2 |
| DLPS2 | Intrachromosomal non-reciprocal orientation - amplicon-to-amplicon                        | Somatic | 19 | 4548497-45491665  | 19 | 11564808-11565242  | 329 | TESK2   | NM_007170      | - | CDS    | Intron 3  | 2 |
| DLPS2 | Intrachromosomal non-reciprocal orientation - amplicon-to-amplicon                        | Somatic | 19 | 4548503-45491665  | 19 | 11565043-11565241  | 28  | TESK2   | NM_007170      | - | CDS    | Intron 3  | 2 |
| DLPS2 | Intrachromosomal non-reciprocal orientation - amplicon-to-amplicon                        | Somatic | 19 | 4548497-45491665  | 19 | 2711438-27116310   | 45  | TESK2   | NM_007170      | - | CDS    | Intron 3  | 2 |
| DLPS2 | Intrachromosomal non-reciprocal orientation - amplicon-to-amplicon                        | Somatic | 19 | 4548497-45491665  | 19 | 2711279-27116310   | 47  | TESK2   | NM_007170      | - | CDS    | Intron 3  | 2 |
| DLPS2 | Intrachromosomal non-reciprocal orientation - amplicon-to-amplicon                        | Somatic | 19 | 4548497-45491665  | 19 | 11561228-11561289  | 5   |         |                |   |        |           |   |



|       |                                                                |         |                  |    |                   |     |        |             |   |        |                 |         |          |   |
|-------|----------------------------------------------------------------|---------|------------------|----|-------------------|-----|--------|-------------|---|--------|-----------------|---------|----------|---|
| DLPS2 | Interhomosomal non-reciprocal - amplification to amplification | Somatic | 3493456-3493678  | 12 | 67387344-6738924  | 266 | TTC23L | NM_144725   | + | CDS    | Intron 10       | 0       |          |   |
| DLPS2 | Interhomosomal non-reciprocal - amplification to amplification | Somatic | 3510396-3510520  | 9  | 61560901-6156308  | 93  | PRLR   | NM_000949   | + | CDS    | Intron 2        | 0       |          |   |
| DLPS2 | Interhomosomal non-reciprocal - amplification to amplification | Somatic | 3511861-3512007  | 6  | 61560901-6156308  | 93  | PRLR   | NM_000949   | + | CDS    | Intron 2        | 0       |          |   |
| DLPS2 | Interhomosomal non-reciprocal - amplification to amplification | Somatic | 3513485-3513549  | 9  | 61560901-6156308  | 93  | PRLR   | NM_000949   | + | CDS    | Intron 2        | 0       |          |   |
| DLPS2 | Interhomosomal non-reciprocal - amplification to amplification | Somatic | 3513493-3513576  | 8  | 61560901-6156308  | 93  | PRLR   | NM_000949   | + | CDS    | Intron 2        | 0       |          |   |
| DLPS2 | Interhomosomal non-reciprocal - amplification to amplification | Somatic | 3515885-3516121  | 9  | 61560901-6156308  | 93  | PRLR   | NM_000949   | + | CDS    | Intron 1        | -1      |          |   |
| DLPS2 | Interhomosomal non-reciprocal - amplification to amplification | Somatic | 3515885-3516121  | 9  | 61560901-6156308  | 93  | PRLR   | NM_000949   | + | CDS    | Intron 1        | -1      |          |   |
| DLPS2 | Interhomosomal non-reciprocal - amplification to amplification | Somatic | 3516217-3516431  | 9  | 61560901-6156308  | 93  | PRLR   | NM_000949   | + | CDS    | Intron 1        | -1      |          |   |
| DLPS2 | Interhomosomal non-reciprocal - amplification to amplification | Somatic | 3516217-3516431  | 9  | 61560901-6156308  | 93  | PRLR   | NM_000949   | + | CDS    | Intron 1        | -1      |          |   |
| DLPS2 | Interhomosomal non-reciprocal - amplification to amplification | Somatic | 3524175-3524265  | 5  | 38974540-3897543  | 15  | PRLR   | NM_000949   | + | CDS    | Intron 1        | -1      |          |   |
| DLPS2 | Interhomosomal non-reciprocal - amplification to amplification | Somatic | 3524175-3524265  | 5  | 38974540-3897543  | 15  | PRLR   | NM_000949   | + | CDS    | Intron 1        | -1      |          |   |
| DLPS2 | Interhomosomal non-reciprocal - amplification to amplification | Somatic | 3527218-3527431  | 9  | 3905356-3905700   | 136 | PRLR   | NM_000949   | + | CDS    | Intron 1        | -1      |          |   |
| DLPS2 | Interhomosomal non-reciprocal - amplification to amplification | Somatic | 3527218-3527431  | 9  | 3905356-3905700   | 136 | PRLR   | NM_000949   | + | CDS    | Intron 1        | -1      |          |   |
| DLPS2 | Interhomosomal non-reciprocal - amplification to amplification | Somatic | 3528265-3528553  | 9  | 11941442-11941710 | 21  | PRLR   | NM_000949   | + | CDS    | Intron 1        | -1      |          |   |
| DLPS2 | Interhomosomal non-reciprocal - amplification to amplification | Somatic | 3531968-3531974  | 7  | 61560901-6156308  | 93  | PRLR   | NM_000949   | + | CDS    | Intron 1        | -1      |          |   |
| DLPS2 | Interhomosomal non-reciprocal - amplification to amplification | Somatic | 3551842-3551869  | 12 | 67564484-6756411  | 13  |        |             |   | CPM    | NM_001874       | CDS     | Intron 3 | 0 |
| DLPS2 | Interhomosomal non-reciprocal - amplification to amplification | Somatic | 3555702-35559678 | 6  | 4625078-4625164   | 7   |        |             |   | RICTOR | NM_152756       | CDS     | Intron 3 | 0 |
| DLPS2 | Interhomosomal non-reciprocal - amplification to amplification | Somatic | 3559253-3559275  | 5  | 3905356-3905700   | 23  |        |             |   | CPM    | NM_00114088     | CDS     | Intron 4 | 1 |
| DLPS2 | Interhomosomal non-reciprocal - amplification to amplification | Somatic | 3567962-3568061  | 12 | 6756269-6756128   | 20  | SPEZF  | NM_024867   | + | CDS    | Intron 3        | 2       |          |   |
| DLPS2 | Interhomosomal non-reciprocal - amplification to amplification | Somatic | 3574123-3574269  | 6  | 4601204-4601354   | 48  |        |             |   | CLIC5  | NM_00114088     | CDS     | Intron 4 | 1 |
| DLPS2 | Interhomosomal non-reciprocal - amplification to amplification | Somatic | 3578539-3580011  | 12 | 67778162-6777938  | 14  | SPEZF  | NM_024867   | + | CDS    | Intron 25       | 0       |          |   |
| DLPS2 | Interhomosomal non-reciprocal - amplification to amplification | Somatic | 3584584-3584589  | 9  | 11662924-1166296  | 25  | SPEZF  | NM_024867   | + | CDS    | Intron 30       | 0       |          |   |
| DLPS2 | Interhomosomal non-reciprocal - amplification to amplification | Somatic | 3600205-3600232  | 12 | 67639448-6764193  | 50  | UGT3A1 | NM_152404   | + | CDS    | Intron 4        | 0       |          |   |
| DLPS2 | Interhomosomal non-reciprocal - amplification to amplification | Somatic | 3600578-3600721  | 12 | 85324316-8532659  | 6   | UGT3A1 | NM_152404   | + | CDS    | Intron 2        | -1      |          |   |
| DLPS2 | Interhomosomal non-reciprocal - amplification to amplification | Somatic | 3600793-3601037  | 19 | 5840204-5840155   | 107 | UGT3A1 | NM_152404   | + | CDS    | Intron 2        | -1      |          |   |
| DLPS2 | Interhomosomal non-reciprocal - amplification to amplification | Somatic | 3602091-3602100  | 13 | 1932094-1932093   | 1   | UGT3A1 | NM_152404   | + | CDS    | Intron 2        | -1      |          |   |
| DLPS2 | Interhomosomal non-reciprocal - amplification to amplification | Somatic | 3602490-3603126  | 9  | 11725614-11725748 | 13  |        |             |   |        |                 |         |          |   |
| DLPS2 | Interhomosomal non-reciprocal - amplification to amplification | Somatic | 3606006-3606097  | 6  | 4547016-4547541   | 11  |        |             |   |        |                 |         |          |   |
| DLPS2 | Interhomosomal non-reciprocal - amplification to amplification | Somatic | 3611920-36111105 | 19 | 6696330-6696532   | 71  |        |             |   |        |                 |         |          |   |
| DLPS2 | Interhomosomal non-reciprocal - amplification to amplification | Somatic | 3617599-3617621  | 9  | 11821770-11821792 | 12  |        |             |   |        |                 |         |          |   |
| DLPS2 | Interhomosomal non-reciprocal - amplification to amplification | Somatic | 3622054-3622261  | 12 | 6844289-6845034   | 44  |        |             |   |        |                 |         |          |   |
| DLPS2 | Interhomosomal non-reciprocal - amplification to amplification | Somatic | 3633438-3633583  | 12 | 68573185-6857419  | 12  | LMBRD2 | NM_00107827 | + | CDS    | Intron 4        | 2       |          |   |
| DLPS2 | Interhomosomal non-reciprocal - amplification to amplification | Somatic | 3644508-3644673  | 5  | 3646586-3646739   | 52  |        |             |   |        |                 |         |          |   |
| DLPS2 | Interhomosomal non-reciprocal - amplification to amplification | Somatic | 3644508-3644673  | 5  | 3646586-3646739   | 52  |        |             |   |        |                 |         |          |   |
| DLPS2 | Interhomosomal non-reciprocal - amplification to amplification | Somatic | 3645378-3645467  | 6  | 49750217-4975166  | 45  |        |             |   |        |                 |         |          |   |
| DLPS2 | Interhomosomal non-reciprocal - amplification to amplification | Somatic | 3645378-3645467  | 6  | 49750217-4975166  | 45  |        |             |   |        |                 |         |          |   |
| DLPS2 | Interhomosomal non-reciprocal - amplification to amplification | Somatic | 3645426-3645525  | 6  | 4974359-4974624   | 19  |        |             |   |        |                 |         |          |   |
| DLPS2 | Interhomosomal non-reciprocal - amplification to amplification | Somatic | 3646034-3646161  | 6  | 3646034-3646161   | 28  |        |             |   |        |                 |         |          |   |
| DLPS2 | Interhomosomal non-reciprocal - amplification to amplification | Somatic | 3646132-3646303  | 12 | 6838070-6838932   | 91  |        |             |   |        |                 |         |          |   |
| DLPS2 | Interhomosomal non-reciprocal - amplification to amplification | Somatic | 3646786-3646979  | 19 | 5089728-5089738   | 8   |        |             |   |        |                 |         |          |   |
| DLPS2 | Interhomosomal non-reciprocal - amplification to amplification | Somatic | 3652364-3652631  | 19 | 6696330-6696532   | 194 |        |             |   |        |                 |         |          |   |
| DLPS2 | Interhomosomal non-reciprocal - amplification to amplified DNA | Somatic | 3657940-3657931  | 9  | 1225945-1225934   | 187 |        |             |   |        |                 |         |          |   |
| DLPS2 | Interhomosomal non-reciprocal - amplification to amplified DNA | Somatic | 3658153-3658159  | 9  | 1224978-1224983   | 47  |        |             |   |        |                 |         |          |   |
| DLPS2 | Interhomosomal non-reciprocal - amplification to amplified DNA | Somatic | 3658773-3658840  | 12 | 12285564-12285622 | 25  |        |             |   |        |                 |         |          |   |
| DLPS2 | Interhomosomal non-reciprocal - amplification to amplified DNA | Somatic | 3663478-3663478  | 5  | 3663478-3663478   | 159 |        |             |   |        |                 |         |          |   |
| DLPS2 | Interhomosomal non-reciprocal - amplification to amplified DNA | Somatic | 3663703-3663704  | 6  | 4214692-4214815   | 26  |        |             |   |        |                 |         |          |   |
| DLPS2 | Interhomosomal non-reciprocal - amplification to amplification | Somatic | 3663987-3664213  | 12 | 6929721-6929827   | 16  |        |             |   |        |                 |         |          |   |
| DLPS2 | Interhomosomal non-reciprocal - amplification to amplification | Somatic | 3667162-3667250  | 6  | 4899972-4897075   | 46  | SLC1A3 | NM_004172   | + | CDS    | Intron 3        | 1       |          |   |
| DLPS2 | Interhomosomal non-reciprocal - amplification to amplification | Somatic | 3668037-3668058  | 6  | 6737411-6737426   | 16  | SLC1A3 | NM_004172   | + | CDS    | Intron 3        | 1       |          |   |
| DLPS2 | Interhomosomal non-reciprocal - amplification to amplification | Somatic | 3668569-3668818  | 7  | 11848893-11848804 | 214 | SLC1A3 | NM_004172   | + | CDS    | Intron 3        | 1       |          |   |
| DLPS2 | Interhomosomal non-reciprocal - amplification to amplification | Somatic | 3669225-3669874  | 12 | 6831811-6831876   | 13  |        |             |   |        |                 |         |          |   |
| DLPS2 | Interhomosomal non-reciprocal - amplification to amplification | Somatic | 3672366-3672365  | 6  | 4498911-4498156   | 29  |        |             |   |        |                 |         |          |   |
| DLPS2 | Interhomosomal non-reciprocal - amplification to amplification | Somatic | 3676142-3676369  | 9  | 11574501-11574584 | 481 |        |             |   |        |                 |         |          |   |
| DLPS2 | Interhomosomal non-reciprocal - amplification to amplification | Somatic | 3691195-3691660  | 6  | 4203361-4203332   | 5   | NFBL   | NM_133433   | + | CDS    | Intron 1        | -1      |          |   |
| DLPS2 | Interhomosomal non-reciprocal - amplification to amplification | Somatic | 3691195-3691660  | 6  | 4203361-4203332   | 5   | NFBL   | NM_133433   | + | CDS    | Intron 1        | -1      |          |   |
| DLPS2 | Interhomosomal non-reciprocal - amplification to amplification | Somatic | 3691922-3691804  | 12 | 6073763-6073708   | 74  | NFBL   | NM_133433   | + | CDS    | Intron 1        | -1      |          |   |
| DLPS2 | Interhomosomal non-reciprocal - amplification to amplification | Somatic | 3705920-3710363  | 12 | 6381723-6381863   | 32  | NFBL   | NM_133433   | + | CDS    | Intron 2        | -1      |          |   |
| DLPS2 | Interhomosomal non-reciprocal - amplification to amplification | Somatic | 3724107-3724306  | 6  | 4983784-4984169   | 11  | CSY42  | NM_023073   | + | CDS    | Intron 18       | 1       |          |   |
| DLPS2 | Interhomosomal non-reciprocal - amplification to amplification | Somatic | 3728913-3729159  | 9  | 4444241-4444256   | 65  |        |             |   |        |                 |         |          |   |
| DLPS2 | Interhomosomal non-reciprocal - amplification to amplification | Somatic | 3744063-3744715  | 15 | 2143687-2143714   | 32  | NUP155 | NM_153485   | + | CDS    | Intron 22       | 0       |          |   |
| DLPS2 | Interhomosomal non-reciprocal - amplification to amplification | Somatic | 3737132-3737947  | 6  | 11393100-11393100 | 460 | NUP155 | NM_153485   | + | CDS    | Intron 10       | 1       |          |   |
| DLPS2 | Interhomosomal non-reciprocal - amplification to amplification | Somatic | 3738169-3738346  | 9  | 7805969-7807224   | 41  | NUP155 | NM_153485   | + | CDS    | Intron 9        | 2       |          |   |
| DLPS2 | Interhomosomal non-reciprocal - amplification to amplification | Somatic | 3748491-3749161  | 6  | 4961191-4961067   | 472 | NUP155 | NM_153485   | + | CDS    | Intron 2        | -1      |          |   |
| DLPS2 | Interhomosomal non-reciprocal - amplification to amplification | Somatic | 3754406-3746201  | 14 | 10238428-10238478 | 334 | WRD70  | NM_180304   | + | CDS    | Intron 8        | 2       |          |   |
| DLPS2 | Interhomosomal non-reciprocal - amplification to amplification | Somatic | 3774558-3776218  | 14 | 10215762-10215426 | 18  | WRD70  | NM_180304   | + | CDS    | Intron 17       | 1       |          |   |
| DLPS2 | Interhomosomal non-reciprocal - amplification to amplification | Somatic | 3781893-3781893  | 6  | 6774485-6774580   | 19  |        |             |   |        |                 |         |          |   |
| DLPS2 | Interhomosomal non-reciprocal - amplification to amplified DNA | Somatic | 3828327-3824063  | 5  | 4596159-4596216   | 799 |        |             |   |        |                 |         |          |   |
| DLPS2 | Interhomosomal non-reciprocal - amplification to amplified DNA | Somatic | 3828748-3828969  | 6  | 4596159-4596216   | 675 |        |             |   |        |                 |         |          |   |
| DLPS2 | Interhomosomal non-reciprocal - amplification to amplified DNA | Somatic | 3833450-3833710  | 19 | 4080260-4081138   | 675 | EGFLAM | NM_152403   | + | CDS    | Intron 1        | 0       |          |   |
| DLPS2 | Interhomosomal non-reciprocal - amplification to amplified DNA | Somatic | 3835696-3836678  | 9  | 11379314-11379398 | 15  | EGFLAM | NM_152403   | + | CDS    | Intron 1        | 0       |          |   |
| DLPS2 | Interhomosomal non-reciprocal - amplification to amplified DNA | Somatic | 3837504-3837518  | 38 | 3837504-3837518   | 38  | EGFLAM | NM_152403   | + | CDS    | Intron 1        | 0       |          |   |
| DLPS2 | Interhomosomal non-reciprocal - amplification to amplified DNA | Somatic | 3841872-3841785  | 6  | 4572936-4573127   | 169 | EGFLAM | NM_152403   | + | CDS    | Intron 6        | 2       |          |   |
| DLPS2 | Interhomosomal non-reciprocal - amplified DNA to amplification | Somatic | 3841892-3841775  | 12 | 6779452-6771876   | 158 | EGFLAM | NM_152403   | + | CDS    | Intron 6        | 2       |          |   |
| DLPS2 | Interhomosomal non-reciprocal - amplified DNA to amplification | Somatic | 3842038-3842611  | 12 | 4137370-4136833   | 5   | RICTOR | NM_152756   | + | CDS    | Intron 17       | 1       |          |   |
| DLPS2 | Interhomosomal non-reciprocal - amplification to amplification | Somatic | 3897529-3897611  | 6  | 3897529-3897611   | 6   | RICTOR | NM_152756   | + | CDS    | Exon 38 Unknown | Unknown |          |   |
| DLPS2 | Interhomosomal non-reciprocal - amplification to amplification | Somatic | 3909418-3909435  | 5  | 3909418-3909435   | 126 | RICTOR | NM_152756   | + | CDS    | Exon 38 Unknown | Unknown |          |   |
| DLPS2 | Interhomosomal non-reciprocal - amplification to amplification | Somatic | 3914001-3914521  | 12 | 3914001-3914521   | 51  | RICTOR | NM_152756   | + | CDS    | Intron 2        | 1       |          |   |
| DLPS2 | Interhomosomal non-reciprocal - amplification to amplification | Somatic | 3914558-3914527  | 5  | 4075811-4074741   | 234 | FYB    | NM_199335   | + | CDS    | Intron 15       | 1       |          |   |
| DLPS2 | Interhomosomal non-reciprocal - amplification to amplification | Somatic | 3925773-3925294  | 9  | 12251850-12251284 | 204 |        |             |   |        |                 |         |          |   |
| DLPS2 | Interhomosomal non-reciprocal - amplification to amplification | Somatic | 3925226-3925238  | 6  | 4837404-4837463   | 60  |        |             |   |        |                 |         |          |   |
| DLPS2 | Interhomosomal non-reciprocal - amplification to amplification | Somatic | 3925232-3925424  | 12 | 6751797-6752013   | 12  |        |             |   |        |                 |         |          |   |
| DLPS2 | Interhomosomal non-reciprocal - amplification to amplification | Somatic | 3925232-3925267  | 6  | 6862079-6862077   | 1   |        |             |   |        |                 |         |          |   |
| DLPS2 | Interhomosomal non-reciprocal - amplification to amplification | Somatic | 3964915-3964997  | 12 | 6759890-6759942   | 39  |        |             |   |        |                 |         |          |   |
| DLPS2 | Interhomosomal non-reciprocal - amplification to amplification | Somatic | 3964972-3965182  | 9  | 11553631-11553786 | 206 |        |             |   |        |                 |         |          |   |
| DLPS2 | Interhomosomal non-reciprocal - amplification to amplified DNA | Somatic | 3965246-3965603  | 14 | 7717981-7717873</ |     |        |             |   |        |                 |         |          |   |



**Table S3:** Expressed gene fusions.

| Sample | 5' Gene       | Chromosome | Strand | 3' Gene        | Chromosome | Strand | No. of RNA reads spanning fusion junction | No. of atypical DNA mate pairs breakpoint | Frame                | Validated? |
|--------|---------------|------------|--------|----------------|------------|--------|-------------------------------------------|-------------------------------------------|----------------------|------------|
| DLPS2  | <i>RCOR1</i>  | 14         | +      | <i>WDR70</i>   | 5          | +      | 15                                        | 18                                        | Out-of-frame         | Yes        |
| DLPS2  | <i>CNOT2</i>  | 12         | +      | <i>ASTN2</i>   | 9          | -      | 7                                         | 193                                       | Out-of-frame         | Yes        |
| DLPS2  | <i>FGGY</i>   | 1          | +      | <i>RTN1</i>    | 14         | -      | 5                                         | 17                                        | Out-of-frame         | No         |
| DLPS1  | <i>CTDSP2</i> | 12         | -      | <i>FAM19A2</i> | 12         | -      | 4                                         | 33                                        | Out-of-frame         | Yes        |
| DLPS1  | <i>NR6A1</i>  | 9          | -      | <i>TRHDE</i>   | 12         | +      | 4                                         | 40                                        | In-frame             | Yes        |
| DLPS2  | <i>NUP107</i> | 12         | +      | <i>PAPPA</i>   | 9          | +      | 4                                         | 49                                        | Out-of-frame         | Yes        |
| DLPS2  | <i>BAZ2A</i>  | 12         | -      | <i>PTPRR</i>   | 12         | -      | 3                                         | 305                                       | Disrupted transcript | No         |

**Table S4:** Somatic mutations in liposarcoma.

| Gene                 | Nucleotide         | Protein  | Sample <sup>[a]</sup> | Source <sup>[b]</sup> | Type                 | Copy Number <sup>[c]</sup> | Promoter status <sup>[d]</sup> | Predicted functional impact <sup>[e]</sup> |
|----------------------|--------------------|----------|-----------------------|-----------------------|----------------------|----------------------------|--------------------------------|--------------------------------------------|
| HDAC1                | c.G1387T           | p.E463*  | DLPS2                 | Discoverv             | Nonsense             | 2.01                       | Increased (10 <sup>12</sup> )  | ---                                        |
|                      | c.G406A            | p.A136T  | DD442                 | Prevalence            | Missense             | ---                        | ---                            | Medium (1.64)                              |
|                      | c.T451C            | p.C151R  | DD344                 | Prevalence            | Missense             | ---                        | ---                            | High (3.41)                                |
|                      | c.T458C            | p.V153A  | DD5590p0              | Prevalence            | Missense             | ---                        | ---                            | Medium (1.9)                               |
|                      | c.A608G            | p.E203G  | DD611                 | Prevalence            | Missense             | ---                        | ---                            | Medium (1.71)                              |
|                      | c.T736C            | p.S246P  | DD6960-1A             | Prevalence            | Missense             | ---                        | ---                            | Medium (1.45)                              |
|                      | c.G790A            | p.D264N  | DD914                 | Prevalence            | Missense             | ---                        | ---                            | High (2.85)                                |
|                      | c.G1360A           | p.E454K  | DD391                 | Prevalence            | Missense             | ---                        | ---                            | Low (0.49)                                 |
|                      | c.A577G            | p.M193V  | DLPS2                 | Discoverv             | Missense             | 1.08                       | None                           | Low (0.94)                                 |
|                      | c.A977C            | p.E326A  | DD2213                | Prevalence            | Missense             | ---                        | ---                            | Medium (1.30)                              |
| MAPKAP1              | c.A311G            | p.K104R  | DD846                 | Prevalence            | Missense             | ---                        | ---                            | Low (0.77)                                 |
|                      | c.A265G            | p.R89G   | DD846                 | Prevalence            | Missense             | ---                        | ---                            | Low (0.71)                                 |
|                      | c.C1045T           | p.R349*  | DLPS1                 | Discoverv             | Nonsense             | 0.86                       | None                           | ---                                        |
| PTPN9                | c.A1472G           | p.Q491R  | RWD8000-2             | Prevalence            | Missense             | ---                        | ---                            | Low (0.80)                                 |
|                      | c.A1027G           | p.R343G  | WDD171                | Prevalence            | Missense             | ---                        | ---                            | High (3.38)                                |
| DAZAP2               | c.G474T            | p.M158I  | DLPS1                 | Discoverv             | Missense             | 0.94                       | None                           | Low (0.82)                                 |
|                      | chr12:49922753A>G  | ---      | ALT9070               | Prevalence            | Non-coding, 3' UTR   | ---                        | ---                            | ---                                        |
| ABCG2                | chr12:49922779T>C  | ---      | ALT9070               | Prevalence            | Non-coding, 3' UTR   | ---                        | ---                            | ---                                        |
|                      | c.1874_1875insT    | p.G625fs | DLPS1                 | Discoverv             | Frameshift insertion | 1.01                       | None                           | ---                                        |
| AHNAK                | c.G16487A          | p.G5496E | DLPS2                 | Discoverv             | Missense             | 0.92                       | None                           | Neutral (-0.34)                            |
| ATF6B                | c.A421C            | p.T141P  | DLPS1                 | Discoverv             | Missense             | 0.87                       | None                           | Low (0.55)                                 |
| CADM2                | c.G248A            | p.R83H   | DLPS1                 | Discoverv             | Missense             | 1.06                       | None                           | Low (0.14)                                 |
| CSPG4                | c.G3853A           | p.G1285S | DLPS1                 | Discoverv             | Missense             | 0.86                       | None                           | High (2.59)                                |
| HYDIN                | c.C5A              | p.T2K    | DLPS1                 | Discoverv             | Missense             | 0.92                       | None                           | Low (0.39)                                 |
| HYOU1 <sup>[f]</sup> | c.G2029A           | p.V677I  | DLPS1                 | Discoverv             | Missense             | 0.62                       | None                           | Low (0.79)                                 |
| MAP3K4               | chr6:161458265T>C  | ---      | DLPS2                 | Discoverv             | Non-coding, 3' UTR   | 0.99                       | None                           | ---                                        |
| MLK4                 | c.C2195T           | p.S732L  | DLPS2                 | Discoverv             | Missense             | 0.99                       | None                           | Medium (1.03)                              |
| MLK4                 | c.G2196T           | p.S732S  | DLPS2                 | Discoverv             | Silent               | 0.99                       | None                           | Neutral (-0.01)                            |
| PDE4DIP              | c.C424A            | p.L142I  | DLPS2                 | Discoverv             | Missense             | 0.98                       | None                           | Medium (1.24)                              |
| PTCHD1               | c.C1254A           | p.L418L  | DLPS2                 | Discoverv             | Silent               | ---                        | None                           | Neutral (-0.01)                            |
| RAB11FIP2            | chr10:119754620A>G | ---      | DLPS2                 | Discoverv             | Non-coding, 3' UTR   | 1.01                       | None                           | ---                                        |
| SACS <sup>[g]</sup>  | c.G973A            | p.G325R  | DLPS2                 | Discoverv             | Missense             | 0.89                       | None                           | Medium (1.22)                              |
| TBX4                 | c.C1214G           | p.S405C  | DLPS2                 | Discoverv             | Missense             | 1.04                       | Increased (10 <sup>4</sup> )   | Medium (1.36)                              |
| TBX11                | c.C405T            | p.A135A  | DLPS2                 | Discoverv             | Silent, splice-site  | ---                        | None                           | Neutral (-0.18)                            |
| XIRP2                | c.A8674T           | p.S2892C | DLPS2                 | Discoverv             | Missense             | 0.96                       | None                           | Low (0.00)                                 |

[a] DD5590p0, DD6960-1A, RWD8000-2, and ALT9070 are cell lines established at MSK from consenting DLPS patients and tested somatic from available matched normals, as with mutations in the primary tumors.

[b] Discoverv includes mutations from either exome or transcriptome sequence data validated with orthogonal 454 sequencing.

[c] Inferred from segmentation of matched whole-genome sequence

[d] The status of differential methylation; in parentheses, the statistical significance (multiple hypothesis corrected q-value).

[e] The prediction of functional impact available for coding point mutations only (FI score in parentheses; <http://mutationassessor.org/>)

[f] Loss of heterozygosity (LOH)

**Table S5:** Allele-specific expression in liposarcoma transcriptomes.

| Sample | Chromosome | Position  | SNP        | Alleles | Gene     | Reads (normal) | Reads (tumor) <sup>a</sup> | Zygoty | Context         | Protein  | Type        | Q-value  | Copy number <sup>b</sup> | Promoter methylation |
|--------|------------|-----------|------------|---------|----------|----------------|----------------------------|--------|-----------------|----------|-------------|----------|--------------------------|----------------------|
| DLPS2  | chr7       | 5533638   | rs7612     | C/T     | ACTB     | 11/23          | 0/26                       | Hom    | 3' UTR          | --       | --          | 0.202    | 1.11                     | None                 |
| DLPS2  | chr1       | 980669    | rs2799073  | G/A     | AGRN     | 5/6            | 15/0                       | Hom    | 3' UTR          | --       | --          | 0.243    | 1.31                     | None                 |
| DLPS2  | chrX       | 152427617 | rs11538656 | C/A     | BGN      | 13/19          | 20/1                       | Hom    | 3' UTR          | --       | --          | 0.023    | --                       | None                 |
| DLPS2  | chr19      | 533927    | rs8259     | T/A     | BSG      | 17/8           | 26/0                       | Hom    | 3' UTR          | --       | --          | 0.222    | 1.64                     | None                 |
| DLPS2  | chr19      | 6628989   | rs17030    | G/A     | C3       | 21/22          | 3/34                       | Hom    | Exonic          | p.P1632P | Silent      | 0.026    | 1.32                     | None                 |
| DLPS2  | chr5       | 41017932  | rs16870568 | T/C     | C7       | 21/9           | 1/14                       | Hom    | 3' UTR          | --       | --          | 0.027    | 4.85                     | None                 |
| DLPS1  | chr19      | 38565275  | rs2772     | T/G     | CEBPG    | 11/8           | 2/19                       | Hom    | 3' UTR          | --       | --          | 0.241    | 3.92                     | None                 |
| DLPS2  | chr5       | 39407907  | rs1046033  | A/G     | DAB2     | 20/12          | 7/38                       | Het    | 3' UTR          | --       | --          | 0.023    | 14.05                    | None                 |
| DLPS2  | chr5       | 39409010  | rs4578     | C/T     | DAB2     | 16/8           | 7/30                       | Het    | 3' UTR          | --       | --          | 0.065    | 14.05                    | None                 |
| DLPS2  | chr10      | 5848092   | rs1129614  | G/A     | GDI2     | 18/12          | 21/0                       | Hom    | Exonic          | p.T407T  | Silent      | 0.108    | 1.07                     | None                 |
| DLPS1  | chr12      | 56295639  | rs2277323  | G/A     | GEFT     | 8/8            | 1/30                       | Hom    | Exonic          | p.L411L  | Silent      | 0.064    | 13.59                    | None                 |
| DLPS2  | chr20      | 56912202  | rs7121     | C/T     | GNAS     | 14/14          | 0/18                       | Hom    | Exonic          | p.I131I  | Silent      | 0.053    | 1.06                     | None                 |
| DLPS1  | chr12      | 63394427  | rs1061743  | G/C     | GNS      | 13/11          | 1/27                       | Hom    | 3' UTR          | --       | --          | 0.026    | 2.72                     | None                 |
| DLPS2  | chr6       | 31430890  | rs1051488  | C/T     | HLA-B    | 13/31          | 0/35                       | Hom    | Exonic          | p.T329T  | Silent      | 0.065    | 1.05                     | None                 |
| DLPS2  | chr6       | 31432495  | rs1131215  | C/A     | HLA-B    | 21/10          | 0/23                       | Hom    | Exonic          | p.Y98Y   | Silent      | 1.82E-04 | 1.05                     | None                 |
| DLPS2  | chr6       | 31430282  | rs2308655  | C/G     | HLA-B    | 13/17          | 0/27                       | Hom    | Exonic/splicing | p.C349S  | Missense    | 0.026    | 1.05                     | None                 |
| DLPS2  | chr6       | 31345765  | rs41556617 | A/T     | HLA-C    | 24/9           | 3/16                       | Hom    | Exonic          | p.X324X  | Silent      | 0.036    | 1.05                     | None                 |
| DLPS2  | chr6       | 31345781  | rs17413387 | A/G     | HLA-C    | 23/13          | 1/29                       | Hom    | Exonic          | p.L319P  | Missense    | 1.82E-04 | 1.05                     | None                 |
| DLPS2  | chr6       | 31345812  | rs1050180  | T/C     | HLA-C    | 9/13           | 0/20                       | Hom    | Exonic          | p.W309G  | Missense    | 0.207    | 1.05                     | None                 |
| DLPS2  | chr6       | 32654648  | rs1064708  | C/T     | HLA-DRB1 | 13/14          | 1/30                       | Hom    | 3' UTR          | --       | --          | 0.029    | 1.08                     | None                 |
| DLPS2  | chr6       | 32595380  | rs1136795  | C/A     | HLA-DRB5 | 11/6           | 0/10                       | Hom    | Exonic          | p.A133S  | Missense    | 0.161    | 1.08                     | None                 |
| DLPS2  | chr12      | 67524002  | rs7970778  | T/C     | MDM2     | 19/4           | 8/32                       | Het    | 3' UTR          | --       | --          | 0.003    | 22.13                    | None                 |
| DLPS1  | chr12      | 56449006  | rs703842   | A/G     | METTL1   | 7/8            | 1/32                       | Hom    | 3' UTR          | --       | --          | 0.106    | 11.84                    | None                 |
| DLPS1  | chr14      | 21037756  | rs1139130  | A/G     | METTL3   | 3/21           | 14/7                       | Het    | Exonic          | p.N445N  | Silent      | 0.060    | 1.23                     | None                 |
| DLPS2  | chr1       | 61700464  | rs2499543  | G/A     | NFIA     | 4/11           | 21/1                       | Hom    | 3' UTR          | --       | --          | 0.015    | 6.01                     | None                 |
| DLPS1  | chr12      | 56398456  | rs799265   | A/G     | OS9      | 17/16          | 43/0                       | Hom    | Exonic          | p.E465E  | Silent      | 1.82E-04 | 11.84                    | None                 |
| DLPS2  | chr4       | 152811641 | rs4571     | T/C     | PET112L  | 6/10           | 15/0                       | Hom    | 3' UTR          | --       | --          | 0.060    | 1.00                     | None                 |
| DLPS2  | chr11      | 118033676 | rs7389     | T/G     | PHLDB1   | 12/15          | 23/2                       | Hom    | 3' UTR          | --       | --          | 0.064    | 1.06                     | None                 |
| DLPS2  | chr2       | 170201349 | rs1050354  | T/A     | PIIG     | 7/7            | 0/16                       | Hom    | Exonic          | p.D445E  | Missense    | 0.222    | 1.00                     | None                 |
| DLPS1  | chr19      | 5156718   | rs1129626  | C/T     | PTPRS    | 7/27           | 12/6                       | Het    | 3' UTR          | --       | --          | 0.243    | 0.82                     | None                 |
| DLPS2  | chr3       | 23936766  | rs1133926  | A/G     | RPL15    | 16/9           | 31/0                       | Hom    | 3' UTR          | --       | --          | 0.062    | 1.09                     | None                 |
| DLPS1  | chr21      | 43659235  | rs62932362 | G/A     | SIK1     | 23/11          | 3/21                       | Hom    | 3' UTR          | --       | --          | 0.023    | 2.67                     | None                 |
| DLPS1  | chr21      | 43659253  | rs3366     | G/A     | SIK1     | 29/11          | 6/22                       | Het    | 3' UTR          | --       | --          | 0.026    | 2.67                     | None                 |
| DLPS2  | chr5       | 36723613  | rs2269272  | C/T     | SLC1A3   | 17/12          | 33/2                       | Hom    | 3' UTR          | --       | --          | 0.122    | 16.23                    | None                 |
| DLPS2  | chrX       | 47329607  | rs1043428  | C/T     | TIMP1    | 25/16          | 35/3                       | Hom    | Exonic          | p.P87P   | Silent      | 0.202    | --                       | None                 |
| DLPS2  | chrX       | 12903207  | rs41311479 | C/T     | TMSB4X   | 27/9           | 6/19                       | Het    | Splicing        | --       | Splice-site | 0.053    | --                       | None                 |
| DLPS2  | chr17      | 20844368  | rs1044420  | T/C     | USP22    | 8/8            | 0/18                       | Hom    | 3' UTR          | --       | --          | 0.120    | 1.06                     | None                 |
| DLPS1  | chr19      | 21480335  | rs73017722 | C/T     | ZNF429   | 6/10           | 16/1                       | Hom    | 5' UTR          | --       | --          | 0.125    | 2.79                     | None                 |

<sup>a</sup> Actual read counts in tumor underestimated in the presence of genomic amplification due to de-duplication during mutation detection

<sup>b</sup> Ratio of tumor to normal, inferred from segmentation of whole genome sequencing data

**Table S6:** Adenosine-to-inosine RNA editing events.

| Gene             | Edit               | Context         | Type       | Sample(s)         | Coverage in RNA sequencing | Reads from exome calling reference allele | Reads from exome calling alternative allele |
|------------------|--------------------|-----------------|------------|-------------------|----------------------------|-------------------------------------------|---------------------------------------------|
| <i>KHDRBS1</i>   | chr1:32269716A>G   | Exonic          | Missense   | N1                | 10                         | 17                                        | 0                                           |
| <i>CYR61</i>     | chr1:85821301A>G   | Exonic          | Synonymous | N1,DLPS1,N2,DLPS2 | 22,17,17,6                 | 61,73,43,63                               | 0,2,0,0                                     |
| <i>IFI16</i>     | chr1:157251342A>G  | Exonic          | Missense   | N1,N2             | 11,12                      | 35,23                                     | 0,0                                         |
| <i>PRDX6</i>     | chr1:171722133A>G  | Exonic          | Synonymous | N1,N2,DLPS2       | 22,19,7                    | 48,17,31                                  | 0,0,0                                       |
| <i>EDARADD</i>   | chr1:234713081A>G  | 3' UTR          | --         | N1                | 7                          | 27                                        | 0                                           |
| <i>EDARADD</i>   | chr1:234713553A>G  | 3' UTR          | --         | N1                | 6                          | 64                                        | 1                                           |
| <i>FAHD2B</i>    | chr2:97119785A>G   | Exonic          | Synonymous | N1,DLPS2          | 14,6                       | 24,20                                     | 0,0                                         |
| <i>XRCC5</i>     | chr2:216721170A>G  | Exonic          | Synonymous | N1,DLPS1          | 15,13                      | 20,32                                     | 0,0                                         |
| <i>HDLBP</i>     | chr2:241817707A>G  | Exonic          | Synonymous | N1                | 6                          | 41                                        | 0                                           |
| <i>LMCD1</i>     | chr3:8553874A>G    | Exonic          | Synonymous | N1                | 9                          | 15                                        | 0                                           |
| <i>FLNB</i>      | chr3:58116831A>G   | Exonic          | Missense   | N1,DLPS1,N2,DLPS2 | 21,8,19,7                  | 55,33,42,52                               | 0,0,1,0                                     |
| <i>LOC401127</i> | chr4:39159008A>G   | ncRNA           | --         | N1                | 0                          | 68                                        | 0                                           |
| <i>FRG1</i>      | chr4:191121250A>G  | Exonic          | Missense   | DLPS2             | 16                         | 17                                        | 0                                           |
| <i>PARP8</i>     | chr5:49999669A>G   | Exonic          | Synonymous | N1                | 5                          | 99                                        | 0                                           |
| <i>PFDN6</i>     | chr6:33366203A>G   | Exonic          | Synonymous | N1,N2             | 12,5                       | 41,28                                     | 0,0                                         |
| <i>LYPLA2P1</i>  | chr6:33441922A>G   | ncRNA           | --         | N1,DLPS1,N2       | 11,7,5                     | 49,27,16                                  | 0,0,0                                       |
| <i>DDX43</i>     | chr6:74174489A>G   | Exonic          | Missense   | N1                | 7                          | 53                                        | 0                                           |
| <i>FAM26F</i>    | chr6:116891436A>G  | Exonic          | Missense   | N1,N2,DLPS2       | 7,7,11                     | 28,29,38                                  | 0,0,0                                       |
| <i>TWIST1</i>    | chr7:19123032A>G   | Exonic          | Synonymous | N1,DLPS1,N2,DLPS2 | 17,8,10,15                 | 65,48,28,56                               | 2,0,1,0                                     |
| <i>GARS</i>      | chr7:30623275A>G   | Exonic          | Synonymous | N1                | 13                         | 53                                        | 1                                           |
| <i>CCT6A</i>     | chr7:56091599A>G   | Exonic          | Synonymous | N1                | 5                          | 40                                        | 0                                           |
| <i>CHCHD7</i>    | chr8:57291597A>G   | Exonic          | Missense   | N2                | 9                          | 14                                        | 0                                           |
| <i>EDF1</i>      | chr9:138876593A>G  | Exonic          | Synonymous | N2                | 33                         | 42                                        | 0                                           |
| <i>GRK5</i>      | chr10:121197635A>G | Exonic          | Missense   | N2                | 7                          | 17                                        | 0                                           |
| <i>PDHX</i>      | chr11:34944774A>G  | Exonic          | Missense   | N1                | 8                          | 20                                        | 0                                           |
| <i>NDUFS3</i>    | chr11:47560522A>G  | Exonic          | Missense   | N2                | 8                          | 36                                        | 1                                           |
| <i>OTUB1</i>     | chr11:63521590A>G  | Exonic          | Missense   | N1                | 5                          | 31                                        | 0                                           |
| <i>RPL6</i>      | chr12:111328177A>G | Exonic          | Missense   | N1                | 6                          | 62                                        | 0                                           |
| <i>ZNF84</i>     | chr12:132144951A>G | Exonic          | Missense   | N1                | 9                          | 44                                        | 1                                           |
| <i>IPO5</i>      | chr13:97464448A>G  | Exonic          | Synonymous | N1,N2             | 6,8                        | 53,25                                     | 0,0                                         |
| <i>RPL36AL</i>   | chr14:49155239A>G  | 3' UTR          | --         | DLPS1             | 8                          | 37                                        | 0                                           |
| <i>SYNE2</i>     | chr14:63758048A>G  | Exonic;splicing | Missense   | N1,DLPS1,N2,DLPS2 | 19,8,12,7                  | 37,28,19,30                               | 0,0,0,0                                     |
| <i>ZBTB1</i>     | chr14:64059472A>G  | Exonic          | Synonymous | N1                | 14                         | 57                                        | 2                                           |
| <i>MARK3</i>     | chr14:103002522A>G | Exonic          | Synonymous | N1                | 7                          | 14                                        | 0                                           |
| <i>SNX1</i>      | chr15:62215643A>G  | Exonic          | Missense   | DLPS2             | 12                         | 43                                        | 1                                           |
| <i>SNX33</i>     | chr15:73729965A>G  | Exonic          | Synonymous | N1                | 6                          | 24                                        | 0                                           |
| <i>CLUAP1</i>    | chr16:3516456A>G   | Exonic          | Missense   | DLPS2             | 6                          | 36                                        | 0                                           |
| <i>C16orf62</i>  | chr16:19619287A>G  | Exonic          | Synonymous | DLPS1             | 16                         | 73                                        | 1                                           |
| <i>CES8</i>      | chr16:65600571A>G  | 3' UTR          | --         | N1                | 9                          | 20                                        | 0                                           |
| <i>SUZ12</i>     | chr17:27327659A>G  | Exonic          | Missense   | N1                | 6                          | 22                                        | 0                                           |
| <i>ZNF207</i>    | chr17:27720910A>G  | 3' UTR          | --         | N1,DLPS1,N2       | 8,5,7                      | 51,26,43                                  | 0,0,0                                       |
| <i>C17orf71</i>  | chr17:54645427A>G  | Exonic          | Missense   | N1,DLPS2          | 6,5                        | 146,126                                   | 0,0                                         |
| <i>EXOC7</i>     | chr17:71591929A>G  | Exonic          | Missense   | N1,DLPS1          | 14,6                       | 64,80                                     | 2,1                                         |
| <i>RNF213</i>    | chr17:75972237A>G  | Exonic          | Missense   | N2                | 5                          | 54                                        | 0                                           |
| <i>TUBB6</i>     | chr18:12300948A>G  | Exonic          | Missense   | N1,N2             | 22,18                      | 26,18                                     | 0,0                                         |
| <i>DHPS</i>      | chr19:12651285A>G  | Exonic          | Missense   | N1                | 7                          | 46                                        | 0                                           |
| <i>TRIM28</i>    | chr19:63753327A>G  | Exonic;splicing | Missense   | N1,DLPS1,N2,DLPS2 | 41,13,30,18                | 45,38,18,32                               | 0,0,0,1                                     |
| <i>ZNF343</i>    | chr20:2411997A>G   | Exonic          | Missense   | N1                | 7                          | 102                                       | 0                                           |
| <i>SAMHD1</i>    | chr20:34981294A>G  | Exonic          | Missense   | N1                | 5                          | 17                                        | 0                                           |
| <i>MX1</i>       | chr21:41739914A>G  | Exonic          | Missense   | DLPS2             | 9                          | 23                                        | 0                                           |
| <i>EGFL6</i>     | chrX:13545986A>G   | Exonic          | Missense   | DLPS1             | 6                          | 13                                        | 0                                           |
| <i>TTC3L</i>     | chrX:74878249A>G   | ncRNA           | --         | N1                | 7                          | 26                                        | 0                                           |

**Table S7:** Primers used for mutation and methylation validation.

| Experiment                      | Target         | Primer                            | Sequence                                                                    |
|---------------------------------|----------------|-----------------------------------|-----------------------------------------------------------------------------|
| Bisulfite                       | CEBPA          | Ver1_peak_position                | ATCTCCCTCACACTT (F:AGTTTGGGGATTTTAAAGT, R:CCTTACCAACCTAAAACCACATC)          |
| Bisulfite                       | CEBPA          | Ver2_upstream                     | GATAGTGGTTTAGGTTG (F:TGTTATAGGTGAGGGAAGATT, R:ACCCAAATAAATCTCTTCTT)         |
| Bisulfite                       | miR-193b       | S1                                | GATTTTGGTGAGATGAT (F:CAAGATTTTGGTATTTTGGTGAATGAG, R:CTCCAAAATAAATCCCAATTCA) |
| Bisulfite                       | miR-193b       | S1                                | GATGGTGGGGGGAATTA (F:GGGAGTGGTTTGGTGAATGAG, R:TCCCTCCCAACCAATCAGCAATC)      |
| Mutation validation (discovery) | ABC2G          | 591350_L_6927793_chr4_89232282    | AAACAATTGCTGCTGGTCA                                                         |
| Mutation validation (discovery) | ABC2G          | 591350_R_6927794_chr4_89232606    | TGACGGCTGATGAGTAA                                                           |
| Mutation validation (discovery) | AHNK4          | 602954_L_1613151_chr11_62041767   | GATTTTGGGCGCTCAAGT                                                          |
| Mutation validation (discovery) | AHNK4          | 602954_R_1613152_chr11_62042096   | AGCGCAAAAGTAAAGAGGA                                                         |
| Mutation validation (discovery) | ATF6B          | 728939_L_7637027_chr6_32201780    | TGCACTTCCCTCATCTAC                                                          |
| Mutation validation (discovery) | ATF6B          | 728939_R_7637028_chr6_32202096    | AAAGCTTTTGTTCGCTCTT                                                         |
| Mutation validation (discovery) | CADM2          | 110359_L_6428217_chr3_86015027    | TGGCCAAAGAAACATTTATTG                                                       |
| Mutation validation (discovery) | CADM2          | 110359_R_6428218_chr3_86015365    | TTTGTGTATGATGATGCTGCT                                                       |
| Mutation validation (discovery) | CSPG4          | 732758_L_3171181_chr15_73764830   | CTCCAGCTCCCAAGGAC                                                           |
| Mutation validation (discovery) | CSPG4          | 732758_R_3171182_chr15_73765163   | ACAGTGGACCCCTTGAGAC                                                         |
| Mutation validation (discovery) | DAZAP2         | 161490_L_2122907_chr12_49922297   | TCTTACAGGCTCTGCTCT                                                          |
| Mutation validation (discovery) | DAZAP2         | 161490_R_2122908_chr12_49922639   | CACCAAGAGACCCCAAGC                                                          |
| Mutation validation (discovery) | HDAC1          | 250269_L_212655_chr11_32570795    | GTAGTGTGGGGAAGGGGTC                                                         |
| Mutation validation (discovery) | HDAC1          | 250269_R_212656_chr11_32571013    | TTTCTCAGAGTGGGGAC                                                           |
| Mutation validation (discovery) | HYO1N          | 846524_L_3583829_chr16_69778082   | TTTGTAGATGCAAGTAGCA                                                         |
| Mutation validation (discovery) | HYO1N          | 846524_R_3583830_chr16_69778418   | AAATCTCTGATGAAAGAA                                                          |
| Mutation validation (discovery) | HYOU1          | 846816_L_1849901_chr11_118424532  | ACTTGAGACTCTGGTCCGA                                                         |
| Mutation validation (discovery) | HYOU1          | 846816_R_1849902_chr11_118424865  | TGGGAATGAGGAGGGCAG                                                          |
| Mutation validation (discovery) | MAP3K4         | 330140_L_7978811_chr6_161458124   | TACTGTACAGCCATCCGTC                                                         |
| Mutation validation (discovery) | MAP3K4         | 330140_R_7978812_chr6_161458450   | TGCTTGGCTCATAGTGTGTT                                                        |
| Mutation validation (discovery) | MAPKAP1        | 913725_L_9069125_chr9_127387559   | CAGCCCAATGCTGAAAGA                                                          |
| Mutation validation (discovery) | MAPKAP1        | 913725_R_9069126_chr9_127387893   | GGAGAGCAGTGGGGTCTGA                                                         |
| Mutation validation (discovery) | MLK4           | 297577_L_929221_chr11_231581393   | CTTCTGGGAAAGATCTCAGA                                                        |
| Mutation validation (discovery) | MLK4           | 297577_R_929222_chr11_231581694   | CTTCTGGGAAAGATCTCAGA                                                        |
| Mutation validation (discovery) | MLK4           | 297577_L_929221_chr11_231581393   | CTTCTGGGAAAGATCTCAGA                                                        |
| Mutation validation (discovery) | MLK4           | 297577_R_929222_chr11_231581694   | CTTCTGGGAAAGATCTCAGA                                                        |
| Mutation validation (discovery) | PDE4DIP        | 976531_L_530961_chr11_143727125   | GGCAACTCATGGGTCATA                                                          |
| Mutation validation (discovery) | PDE4DIP        | 976531_R_530962_chr11_143727456   | TGATTTCTGCTGAATGTGC                                                         |
| Mutation validation (discovery) | PTCHD1         | 433314_L_9232803_chrX_23320639    | AGCGACATCCATCTCTCT                                                          |
| Mutation validation (discovery) | PTCHD1         | 433314_R_9232804_chrX_23320991    | GTAGTGTCTCTCTCTCTCT                                                         |
| Mutation validation (discovery) | PTPN9          | 1007867_L_3169683_chr15_73569537  | AAAGCTCTTGGGAAGAGC                                                          |
| Mutation validation (discovery) | PTPN9          | 1007867_R_3169684_chr15_73569785  | GCACCCCTTAGCTGTGTC                                                          |
| Mutation validation (discovery) | RAB11FIP2      | 1012246_L_1331626_chr10_119754814 | TCATCATCAGATGAAATATAC                                                       |
| Mutation validation (discovery) | RAB11FIP2      | 1012246_R_1331626_chr10_119754814 | AGATGTGATGTTTCACTATTG                                                       |
| Mutation validation (discovery) | SACS           | 1035522_L_2438979_chr13_22827703  | TTATAGAAATCGCCCTCA                                                          |
| Mutation validation (discovery) | SACS           | 1035522_R_2438980_chr13_22828016  | CAGTTTGACCATTTGTTGG                                                         |
| Mutation validation (discovery) | TBK4           | 512410_L_4043977_chr17_56915101   | CTTCTGATGATGATGATGTT                                                        |
| Mutation validation (discovery) | TBK4           | 512410_R_4043978_chr17_56915436   | TAAAGTGGGCACTTCTGTT                                                         |
| Mutation validation (discovery) | TEX11          | 1091365_L_9341107_chrX_69989723   | CAGACTTGGAAAATAAACCA                                                        |
| Mutation validation (discovery) | TEX11          | 1091365_R_9341108_chrX_69989980   | TTTCTTCAATTTCCCCCA                                                          |
| Mutation validation (discovery) | XIRP2          | 136877_L_5254452_chr2_167814949   | CTTCTGATGATGATGATGTT                                                        |
| Mutation validation (discovery) | XIRP2          | 136877_R_5254458_chr2_167814949   | GGGATTTCTCACAGGAGAAA                                                        |
| Mutations (prevalence)          | DAZAP2         | 96560_L_11839416_chr12_49918476   | TGAATCGGTAGGTGGAAA                                                          |
| Mutations (prevalence)          | DAZAP2         | 96560_R_11839417_chr12_49919557   | CGCGTATTTGGTATGAGC                                                          |
| Mutations (prevalence)          | DAZAP2         | 96561_L_14129918_chr12_49920905   | CGCCAGGTAGCTTACAGCC                                                         |
| Mutations (prevalence)          | DAZAP2         | 96561_R_14129919_chr12_49921023   | GCTCAAGAAGCAAACTCA                                                          |
| Mutations (prevalence)          | DAZAP2         | 96562_L_14309830_chr12_49920723   | TGAATTTGGTGTGTGAGC                                                          |
| Mutations (prevalence)          | DAZAP2         | 96562_R_14309831_chr12_49922044   | GCAGAGCTGCAGACAGTGA                                                         |
| Mutations (prevalence)          | DAZAP2         | 96563_L_14309832_chr12_49922044   | CCGATGTTCTGATGATGTT                                                         |
| Mutations (prevalence)          | DAZAP2         | 96563_R_chr12_49922850_notail     | GCTCAAGTCCCTCCAAACC                                                         |
| Mutations (prevalence)          | HDAC1          | 151511_L_12860342_chr11_32528886  | GATCTCCAGCAGCCTTTTC                                                         |
| Mutations (prevalence)          | HDAC1          | 151511_R_12860343_chr11_32531281  | CACCTCCCTCTAGAGACTC                                                         |
| Mutations (prevalence)          | HDAC1          | 151512_L_13052732_chr11_32540456  | CCCCAGTACCTTTGGAATGA                                                        |
| Mutations (prevalence)          | HDAC1          | 151512_R_13052733_chr11_32541327  | AATGAATGCATATGGGGAA                                                         |
| Mutations (prevalence)          | HDAC1          | 151513_L_chr11_32554749_notail    | AGCAGCTAGCTCCATGCTG                                                         |
| Mutations (prevalence)          | HDAC1          | 151513_R_chr11_32555887_notail    | TGGGGAATCAGAGCTGTTA                                                         |
| Mutations (prevalence)          | HDAC1          | 151514_L_chr11_32562156_notail    | TGGGTGAGGTGGGATCAG                                                          |
| Mutations (prevalence)          | HDAC1          | 151514_R_chr11_32562301_notail    | GGACTGAACAGAGGAGCAT                                                         |
| Mutations (prevalence)          | HDAC1          | 151515_L_14504910_chr11_32565612  | CTGCTGAAGTAGGTTGGGAG                                                        |
| Mutations (prevalence)          | HDAC1          | 151515_R_14504911_chr11_32565625  | CTTCCAGAGACAGGAGCAG                                                         |
| Mutations (prevalence)          | HDAC1          | 151516_L_chr11_32565594_notail    | CCAGTCTCCAGCTCTCTGTT                                                        |
| Mutations (prevalence)          | HDAC1          | 151516_R_chr11_32565970_notail    | ATTGGGAAAGAGGCAAGAA                                                         |
| Mutations (prevalence)          | HDAC1          | 151517_L_13010543_chr11_32566807  | GTTCTGGTACTCTGCTGTT                                                         |
| Mutations (prevalence)          | HDAC1          | 151517_R_13010543_chr11_32567908  | ACTGACCAACAGAGATCCA                                                         |
| Mutations (prevalence)          | HDAC1          | 151520_L_12182232_chr11_32568120  | TTCAAAGGAGGCTTTGAATG                                                        |
| Mutations (prevalence)          | HDAC1          | 151520_R_12182233_chr11_32569451  | TGAGAACCTTACCCAGTCC                                                         |
| Mutations (prevalence)          | HDAC1          | 151521_L_14515800_chr11_32568382  | CTTGTGATCAACAGAGAGAC                                                        |
| Mutations (prevalence)          | HDAC1          | 151521_R_14515801_chr11_32569155  | ACCATCTTGTGCTACCTG                                                          |
| Mutations (prevalence)          | HDAC1          | 151522_L_1430176_chr11_32568571   | TGAAAAGTAGGAGTGGGTTG                                                        |
| Mutations (prevalence)          | HDAC1          | 151522_R_1430177_chr11_32568982   | CCCTCAGTCCCTACTGCTG                                                         |
| Mutations (prevalence)          | HDAC1          | 151525_L_12416002_chr11_32569277  | CTGGAATGCGGAGTGAAGGG                                                        |
| Mutations (prevalence)          | HDAC1          | 151525_R_12416003_chr11_32570152  | GGGCAAAACCAAGTCAAGGA                                                        |
| Mutations (prevalence)          | HDAC1          | 151526_L_13636682_chr11_32569379  | CTCACAGTGTCTTGGAGGCA                                                        |
| Mutations (prevalence)          | HDAC1          | 151526_R_13636683_chr11_32570078  | CCAGAGACACAGAGGAAAG                                                         |
| Mutations (prevalence)          | HDAC1          | 151528_L_15047560_chr11_32570265  | TTTCCCTGGTCTCTCTGG                                                          |
| Mutations (prevalence)          | HDAC1          | 151528_R_15047561_chr11_32571038  | GTCCAGGAGTCCAGTGAAG                                                         |
| Mutations (prevalence)          | HDAC1          | 151530_L_chr11_32570895_notail    | CTCCAGGCTCTAGGCTAA                                                          |
| Mutations (prevalence)          | HDAC1          | 151530_R_chr11_32571017_notail    | GTGCTTCTCCAGAGTGGT                                                          |
| Mutations (prevalence)          | HDAC1          | 151534_L_chr11_32571140_notail    | GCTGCACATTTGCCCTGAG                                                         |
| Mutations (prevalence)          | HDAC1          | 151534_R_chr11_32571141_notail    | CCAGTGGGAGGATGCAAAA                                                         |
| Mutations (prevalence)          | MAPKAP1        | 554913_L_14789920_chr9_127474281  | CTCCAGATGAGGAGTGTG                                                          |
| Mutations (prevalence)          | MAPKAP1        | 554913_R_14789921_chr9_127475688  | TGCAAGCCCTTCTCTGAT                                                          |
| Mutations (prevalence)          | MAPKAP1        | 554917_L_chr9_127471817_notail    | AACTCCAGAGGATTTAAAGGAT                                                      |
| Mutations (prevalence)          | MAPKAP1        | 554917_R_chr9_127472067_notail    | TGTTCTTTTATGGTAACTTCA                                                       |
| Mutations (prevalence)          | MAPKAP1        | 554922_L_chr9_127458686_notail    | CCAGACCACTCTGCTGCT                                                          |
| Mutations (prevalence)          | MAPKAP1        | 554922_R_chr9_127460029_notail    | CTGCATGCTCCAGCTGAA                                                          |
| Mutations (prevalence)          | MAPKAP1        | 554928_L_1538483_chr9_127387504   | CAGAGCTGGATGAGTACAGA                                                        |
| Mutations (prevalence)          | MAPKAP1        | 554928_R_1538483_chr9_127388251   | TACTCTGGAGTGTCTTTGG                                                         |
| Mutations (prevalence)          | MAPKAP1        | 554934_L_14664410_chr9_127361554  | TAGCTAGTGCAGAGGACAT                                                         |
| Mutations (prevalence)          | MAPKAP1        | 554934_R_14664411_chr9_127362429  | TCCTCAATTTGCTGCTGTT                                                         |
| Mutations (prevalence)          | MAPKAP1        | 554940_L_14683910_chr9_127344950  | CTTCTCAGATGCCCTGTA                                                          |
| Mutations (prevalence)          | MAPKAP1        | 554940_R_14683911_chr9_127346629  | CTCTGGATGATTTGGTCTG                                                         |
| Mutations (prevalence)          | MAPKAP1        | 554946_L_12445782_chr9_127323267  | TCTGTCACTAGTCAAGCCAG                                                        |
| Mutations (prevalence)          | MAPKAP1        | 554946_R_12445783_chr9_127324550  | GGCTCTAAGTGTGCTCTCA                                                         |
| Mutations (prevalence)          | MAPKAP1        | 554947_L_15378756_chr9_127308205  | AGGATCGAGCTCTCTACCA                                                         |
| Mutations (prevalence)          | MAPKAP1        | 554947_R_15378759_chr9_127308880  | CGCTTTTCCAGACTTCTCC                                                         |
| Mutations (prevalence)          | MAPKAP1        | 554951_L_chr9_127286482_notail    | CCCCATTTCCACCCAGTCT                                                         |
| Mutations (prevalence)          | MAPKAP1        | 554951_R_chr9_127286736_notail    | CATTTCGAGCCCTCATGTA                                                         |
| Mutations (prevalence)          | MAPKAP1        | 554955_L_11915202_chr9_127269930  | GGCAGCATATGAAAGTCCG                                                         |
| Mutations (prevalence)          | MAPKAP1        | 554955_R_11915203_chr9_127270878  | TTGTGTGGCCATTTGGAGT                                                         |
| Mutations (prevalence)          | MAPKAP1        | 554960_L_12983932_chr9_127246336  | GGCTGCTGTTGACTGAAGC                                                         |
| Mutations (prevalence)          | MAPKAP1        | 554960_R_12983933_chr9_127247029  | ACCAGAGCCCTCAACACAG                                                         |
| Mutations (prevalence)          | MAPKAP1        | 554969_L_14804710_chr9_127241016  | GTGACTCAGGCACTGGG                                                           |
| Mutations (prevalence)          | MAPKAP1        | 554969_R_14804711_chr9_127241679  | CAGTGTGCTGATGACTGG                                                          |
| Mutations (prevalence)          | PTPN9          | 613219_L_12822996_chr15_73657675  | CTGCCAATCTCGGGAAGAG                                                         |
| Mutations (prevalence)          | PTPN9          | 613219_R_12822997_chr15_73659094  | CTCCGGCTTAAAGATTTCC                                                         |
| Mutations (prevalence)          | PTPN9          | 613221_L_14281290_chr15_73606201  | CTGTACAGGACTCTCTCCG                                                         |
| Mutations (prevalence)          | PTPN9          | 613221_R_14281291_chr15_73607168  | CAGACTTGCTGGGAAAGGG                                                         |
| Mutations (prevalence)          | PTPN9          | 613222_L_chr15_73603534_notail    | TTTATCCAGAAATCTCTCC                                                         |
| Mutations (prevalence)          | PTPN9          | 613222_R_chr15_73603769_notail    | TTTATCCAGAAATCTCTCC                                                         |
| Mutations (prevalence)          | PTPN9          | 613223_L_13891692_chr15_73602326  | TAAAGAACGCCCAACTTCA                                                         |
| Mutations (prevalence)          | PTPN9          | 613223_R_13891693_chr15_73603541  | CCATTTGCGCAGGAAAGTGA                                                        |
| Mutations (prevalence)          | PTPN9          | 613224_L_12717073_chr15_73597291  | TTTATCCAGAAATCTCTCC                                                         |
| Mutations (prevalence)          | PTPN9          | 613224_R_12717073_chr15_73597291  | GTGTGCACTGAGGAGTGT                                                          |
| Mutations (prevalence)          | PTPN9          | 613225_L_12173436_chr15_73588310  | CTAGAAGCAAGCCAGGAGG                                                         |
| Mutations (prevalence)          | PTPN9          | 613225_R_12173437_chr15_73588863  | GGGGAAGAGAGGAGAAACC                                                         |
| Mutations (prevalence)          | PTPN9          | 613226_L_14428974_chr15_73586092  | CTAACCAAGTCAAGGAGTGG                                                        |
| Mutations (prevalence)          | PTPN9          | 613226_R_14428975_chr15_73586085  | CCCATCTCCAAACTTGA                                                           |
| Mutations (prevalence)          | PTPN9          | 613227_L_14590474_chr15_73569135  | ACTCACAAAGGAAATGGAC                                                         |
| Mutations (prevalence)          | PTPN9          | 613227_R_14590475_chr15_73570178  | CCATCTCTCCACCCTAAG                                                          |
| Mutations (prevalence)          | PTPN9          | 613228_L_15230628_chr15_73558693  | TCTCTGGGAAGTCCACTGCT                                                        |
| Mutations (prevalence)          | PTPN9          | 613228_R_15230629_chr15_73559812  | CTGGCCATTTCACTCTCAT                                                         |
| Mutations (prevalence)          | PTPN9          | 613229_L_15302438_chr15_73553072  | CAGGCTGACCTCATATT                                                           |
| Mutations (prevalence)          | PTPN9          | 613229_R_15302439_chr15_73553877  | AGCAGGAGTGGGAAGATG                                                          |
| Mutations (prevalence)          | PTPN9          | 613230_L_14038140_chr15_73549917  | TCTGTGCTGCAATGATGG                                                          |
| Mutations (prevalence)          | PTPN9          | 613230_R_14038141_chr15_73550740  | AGATGATGATGCTGCTGGG                                                         |
| Mutations (prevalence)          | PTPN9          | 613231_L_12283452_chr15_73549629  | ATTCTGGCATCACTGGCTC                                                         |
| Mutations (prevalence)          | PTPN9          | 613231_R_12283453_chr15_73548894  | AGCCAGAGGATGCTAGGGG                                                         |
| Mutations (prevalence)          | PTPN9          | 613236_L_13451902_chr15_73547499  | GGACTGAAATCACGCCCTA                                                         |
| Mutations (prevalence)          | PTPN9          | 613236_R_13451903_chr15_73549046  | CATTGATTTGCTGGTGGT                                                          |
| Gene fusions                    | RSO1-WDR70     | 1F/R                              | F:AGCCAGTCCAGGAGGGGG, R:CCCTCCCACTGCAAGAAAGCC                               |
| Gene fusions                    | CNOT2-ASTN2    | 2F/R                              | F:GGTCACTGCTCAGTTGGGG, R:ACAGGCGCTCCAGGGTCA                                 |
| Gene fusions                    | FGFY-RTN1      | 3F/R                              | F:TACGACAGAAAGCTGGGAGCA, R:CCTGCTCAGTGGGGGCT                                |
| Gene fusions                    | CTDSP2-FAM19A2 | 4F/R                              | F:TCCGGGGGAGAAACAGAGGG, R:TCCGCTCTCTCCCAAGCC                                |
| Gene fusions                    | SNCA1-TRIM8    | 5F/R                              | F:TACCTCTCTCTCAGTGTGCT, R:TCCGCTGTCAGAGGTTGCTG                              |
| Gene fusions                    | HUP107-PAPPA   | 6F/R                              | F:TCCGGGTAGTGTGAGCACT, R:CAAGCAGCAATGCCAGCT                                 |
| Gene fusions                    | BA22A-PTPRB    | 7F/R                              | F:ACTCTGCTCAGTCTCC, R:AGACAGGTAAGGCTCAGGAA                                  |
